# Supplementary material
Source: PubMed Central journal article supplement (PMC1851593)

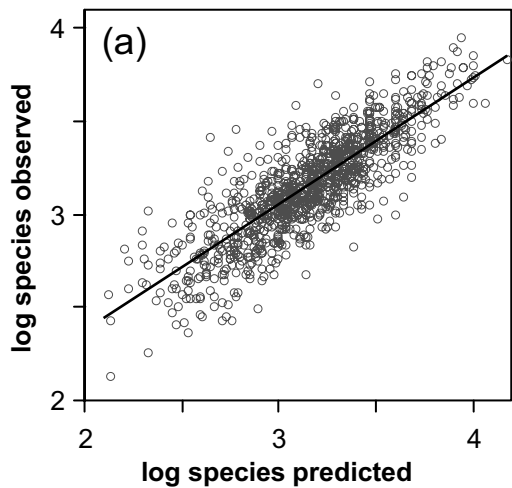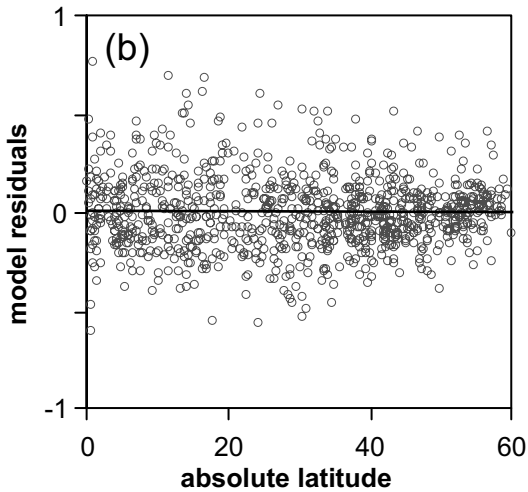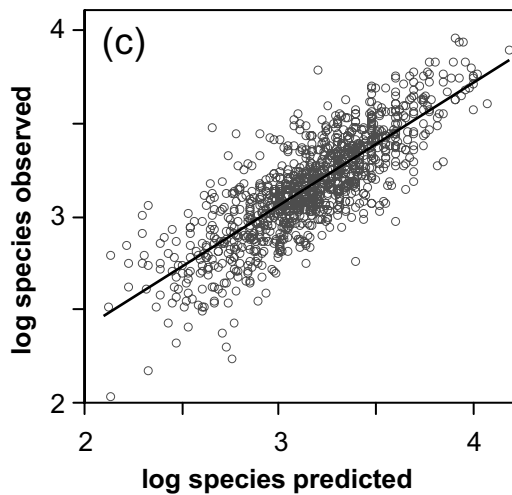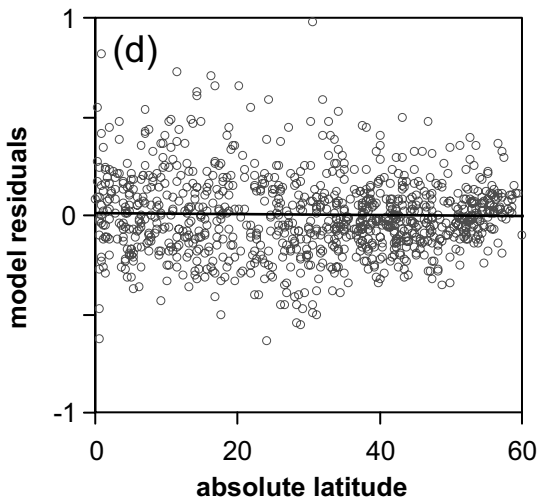

Supplement: pnas_0608361104_1.pdf [file pnas_0608361104_1.pdf]
